# Supplementary material
Source: Springer Nature journal article supplement (https://www.springermedizin.de/resource/supplementary/12985_2010_1025_MOESM8_ESM.pdf/9608974)
Supplement: MOESM8 [file 9608974]

**a**

miRNA - target

**miR164- NAM****mRNA** 5' GCCACGUGCACUGCUUCUCCA 3'

x x | | | | | | | | x | | | | | | | | | | | |

**miRNA** 3' ACGUGCACGGGACGAAGAGGU 5'**miR168- AGO1****mRNA** 5' UUCCCGAGCUGCACCAAGCAA 3'

x | | | | | | | | x | | | | | | | | | | | | x |

**miRNA** 3' CAGGGCUGGACGUGGUUCGCU 5'**miR171- SCL6****mRNA** 5' GAUAUUGGCGCGGCUCAUCA 3'

| | | | | | | | | | o | | | | | | | | | | | |

**miRNA** 3' CUAUAACCGUGCCGAGUUAGU 5'**miR172-AP2****mRNA** 5' CUGCAGCAUCAUCAGGAUUCU 3'

| | | | | | | | | | | | | | | | o | | | | | | | |

**miRNA** 3' GACGUCGUAGUAGUUCUAAGA 5'**miR169-CBF TFs****mRNA** 5' UCGGCAGUUCAUCCUUGGCUA 3'

o x | | | | | | o x | | | | | | | | | | | | | |

**miRNA** 3' GUCCGUUCAGUAGGAACCGAU 5'**b**

Putative miR- cleavage site

FP → ↓

← RP

NAM-like protein
